# Supplementary material
Source: publisher figshare collection journal article supplement (https://karger.figshare.com/ndownloader/files/14859965)
Supplement: Supplementary file 1 [file 14859965]

**Fig. S2.** Purification by immune-affinity by an antibody to Art an 1 and Art an 3 from *A. annua* and protein identity by LC-MS/MS.

**a** SDS-PAGE of purified protein by A7-G4-E6 mAb affinity;

**b** two peptides (amino acids in red and bold) matched to Art an 1 allergen.

**c** SDS-PAGE of purified protein by A2-B8. Sequence coverage is 16.7%, because present of K and R is frequent at N terminal but none in the C terminal.

**d** two unique peptides mass spectrometry (amino acids in red and bold) of Art an 3 by LC-MS/MS. Other matched peptides in bold, over all sequence coverage is 88%.
